# Supplementary material
Source: Springer Nature journal article supplement (https://www.springermedizin.de/resource/supplementary/12916_2009_247_MOESM3_ESM.pdf/9599480)
Supplement: MOESM3 [file 9599480]

Life Expectancy (Years)

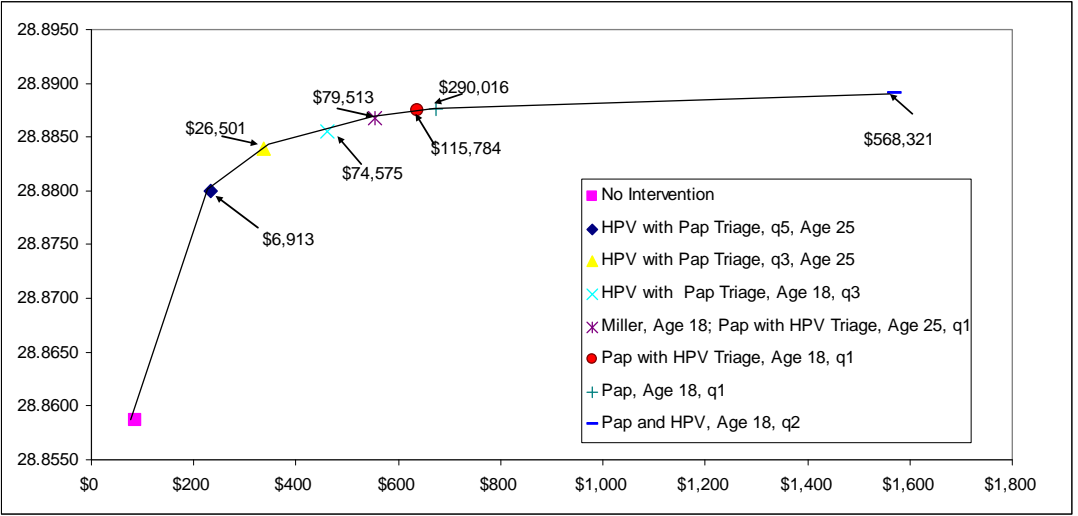

Cost (2006 \$)

Efficiency curve for Ontario

Life Expectancy (Years)

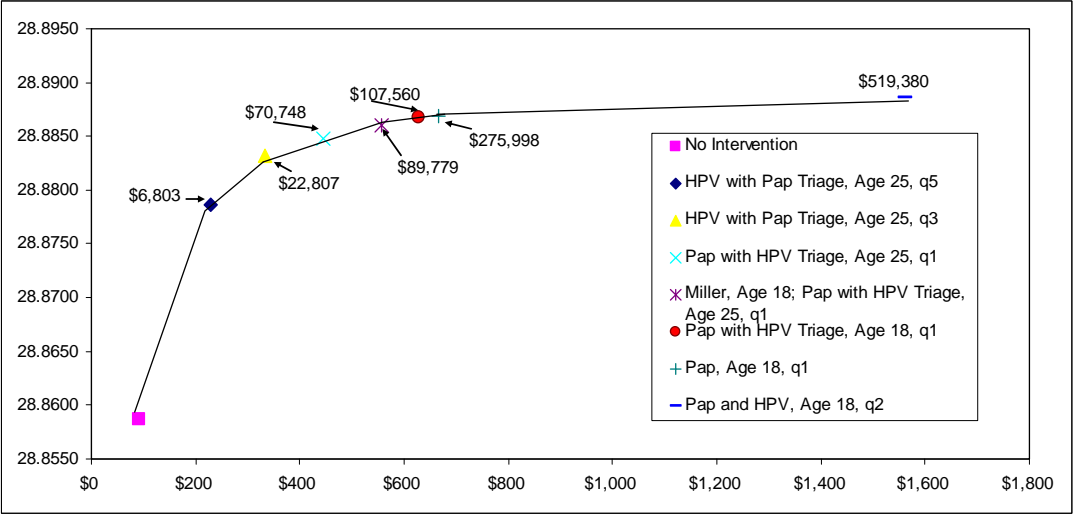

Cost (2006 \$)

Efficiency curve for Newfoundland
